# Supplementary material
Source: PubMed Central journal article supplement (PMC4284404)
Supplement: CJN.02160214_CJN02160214SupplementaryData.pdf [file CJN.02160214_CJN02160214SupplementaryData.pdf]

**Supplementary Table 1: Demographics and clinical characteristics of study cohort**

| <b>Age/<br/>Sex/<br/>Race</b> | <b>Primary<br/>Reason<br/>for ICU<br/>admission</b> | <b>Cause of<br/>AKI</b> | <b>Day of<br/>CRRT<br/>initiation<br/>after ICU<br/>admission</b> | <b>Nutrition</b> | <b>Outcome at end<br/>of<br/>hospital<br/>stay</b> | <b>Cre<br/>mg/<br/>dl</b> | <b>Ph<br/>m<br/>g/<br/>dl</b> | <b>Al<br/>b<br/>g/<br/>dl</b> | <b>pH</b> | <b>DPG<br/>μ<br/>mol/<br/>gm<br/>Hgb</b> | <b>P50<br/>mm<br/>Hg</b> | <b>DPG<br/>μ<br/>mol/<br/>gm<br/>Hgb<br/>Day2</b> |
|-------------------------------|-----------------------------------------------------|-------------------------|-------------------------------------------------------------------|------------------|----------------------------------------------------|---------------------------|-------------------------------|-------------------------------|-----------|------------------------------------------|--------------------------|---------------------------------------------------|
| 54/M<br>/H                    | Septic<br>Shock                                     | TI                      | 7                                                                 | P                | Death                                              | 3.5<br>9                  | 6                             | 3                             | 7.4<br>2  | 21.6                                     | 29.<br>8                 | 18.7                                              |
| 50/M<br>/C <sup>+</sup>       | Septic<br>Shock                                     | M                       | 2                                                                 | E                | Death                                              | 2.9<br>7                  | 4.5                           | 2.8                           | 7.3<br>6  | 15.3                                     | 22.<br>9                 | 10.9                                              |
| 66/M<br>/C <sup>+</sup>       | Heart<br>Failure                                    | TI                      | 33                                                                | E                | HD                                                 | 5.3                       | 5.3                           | 3.6                           | 7.5       | 12.4                                     | 20.<br>7                 | 10.8                                              |
| 54/M<br>/C                    | Respirato<br>ry Failure                             | TI                      | 3                                                                 | P                | Death                                              | 3.7                       | 3.7                           | 2.9                           | 7.4       | 10.5                                     | 23.<br>9                 | 8.8                                               |
| 56/F/<br>C                    | Septic<br>Shock                                     | TI                      | 5                                                                 | N                | Death                                              | 2.8<br>9                  | 5.3                           | 1.9                           | 7.1<br>5  | 15.4                                     | 29.<br>9                 | 13.7                                              |
| 79/M<br>/C <sup>+</sup>       | Respirato<br>ry Failure                             | M                       | 1                                                                 | E                | HD                                                 | 5                         | 6.1                           | 3.1                           | 7.3<br>3  | 12.4                                     | 28.<br>8                 | 10.3                                              |
| 62/M<br>/C <sup>+</sup>       | Heart<br>Failure                                    | M                       | 9                                                                 | E                | Death                                              | 4.1                       | 4.4                           | 2.9                           | 7.3<br>3  | 11.8                                     | 27.<br>1                 | 10.1                                              |
| 76/M<br>/C                    | Septic<br>Shock                                     | TI                      | 7                                                                 | E                | Death                                              | 5.2<br>5                  | 4.7                           | 4                             | 7.3<br>1  | 13.3                                     | 32.<br>4                 | 10.1                                              |
| 36/M<br>/C <sup>+</sup>       | Heart<br>Transpla<br>nt                             | TI                      | 2                                                                 | E                | R                                                  | 4.9                       | 7.8                           | 4.4                           | 7.2<br>7  | 9.64                                     | 32.<br>9                 | 7.2                                               |

|                         |                           |    |   |   |       |                 |                 |                 |                 |               |                   |             |
|-------------------------|---------------------------|----|---|---|-------|-----------------|-----------------|-----------------|-----------------|---------------|-------------------|-------------|
| 74/M<br>/C <sup>+</sup> | Surgery                   | TI | 7 | E | R     | 4.4             | 5.9             | 3.5             | 7.1<br>9        | 12.8          | 30.<br>9          | 11.9        |
| 49/M<br>/C <sup>+</sup> | Septic<br>Shock           | M  | 5 | E | HD    | 4.9<br>6        | 6.9             | 2.9             | 7.3<br>6        | 16.8          | 31.<br>5          | 15.2        |
| 64/M<br>/O              | Surgery                   | TI | 1 | N | HD    | 2.8             | 4.2             | 3.6             | 7.2<br>9        | 9.89          | 31.<br>6          | 7.3         |
| 29/F/<br>C              | Septic<br>Shock           | TI | 1 | E | R     | 3.5             | 6.2             | 3.8             | 7.2<br>3        | 17.2          | 32.<br>8          | 14.2        |
| 67/M<br>/C <sup>+</sup> | Endocard<br>itis          | M  | 3 | N | R     | 5               | 6.7             | 3.5             | 7.3<br>8        | 18.3          | 27.<br>2          | 14.1        |
| 63/F/<br>C *            | Surgery                   | M  | 7 | E | R     | 6.6             | 4.5             | 3.3             | 7.4<br>2        | 12.1          | 27.<br>0          | 10.8        |
| 37/F/<br>C              | Peritoniti<br>s           | TI | 5 | P | Death | 3.3             | 6.1             | 3.9             | 7.2<br>4        | 12.0          | 32.<br>1          | 10.13       |
| 56/M<br>/C <sup>+</sup> | Cirrhosis/<br>Empyem<br>a | TI | 1 | N | Death | 11.<br>5        | 5.5             | 3.5             | 7.4<br>0        | 15.8          | 28.<br>2          | 11.8        |
| 53/M<br>/C              | PEA<br>arrest             | M  | 2 | P | Death | 4.7             | 6.7             | 4.8             | 7.3<br>5        | 13.5          | 33.<br>1          | 11.2        |
| 70/M<br>/C              | Heart<br>Failure          | TI | 1 | N | HD    | 5.7             | 8.7             | 2.9             | 7.3<br>2        | 8.51          | 30.<br>0          | 6.9         |
| 66/F/<br>C <sup>+</sup> | Cardioge<br>nic Shock     | TI | 2 | N | Death | 4.3             | 6.6             | 2.5             | 7.0<br>7        | 8.04          | 41.<br>4          | 6.4         |
| Mea<br>n ±<br>SD        |                           |    |   |   |       | 4.7<br>±<br>1.9 | 5.7<br>±<br>1.2 | 3.3<br>±<br>0.7 | 7.3<br>±<br>.09 | 13.4<br>± 3.4 | 29.<br>7 ±<br>4.4 | 11 ±<br>3.1 |

**Legend:** C, Caucasian; H, Hispanic; P, Parenteral Nutrition; E, Enteral Nutrition; N, None; D, Death; HD, Hemodialysis; M, Multifactorial (AKI secondary to acute interstitial nephritis, athero-embolic disease, and/or contrast induced nephropathy); O, other (Cambodian); R, Recovered; TI, Tubular Injury

**Note:** “‡” denotes patients with CKD (eGFR less than 60ml/min/1.73 m<sup>2</sup>). All patients were on ventilatory support except one (denoted by \*). All laboratory levels drawn at enrollment except when indicated as Day 2.

**Supplementary Table 2: Demographics and clinical characteristics of reference cohort**

| Age/<br>Sex/<br>Race    | Primary Reason for ICU admission | ICU days | Outcome at end of hospital stay | Cre mg/dl     | Ph mg/dl      | Alb g/dl       | pH              | DPG $\mu$ mol/gm Hgb | P50 mm Hg      | DPG $\mu$ mol/gm Hgb (Day 2) |
|-------------------------|----------------------------------|----------|---------------------------------|---------------|---------------|----------------|-----------------|----------------------|----------------|------------------------------|
| 79/F/<br>C              | Mitral Valve repair              | 2        | R                               | 1.0           | M             | 4              | 7.36            | 12.9                 | 27.33          | 13.3                         |
| 50/M<br>/C              | CABG, valve replacement          | 9        | R                               | 1.0           | 3             | 2.7            | 7.40            | 14.2                 | 25.12          | 14.3                         |
| 78/M<br>/C              | CABG                             | 3        | R                               | 0.9           | M             | 3.9            | 7.37            | 9.4                  | 26.2           | 9                            |
| 84/F/<br>C              | Atrial valve replacement         | 3        | R                               | 1.2           | 2.9           | 3.9            | 7.37            | 10.2                 | 29.7           | 10.6                         |
| 82/F/<br>C <sup>+</sup> | CABG                             | 3        | R                               | 1.5           | M             | 3.8            | 7.35            | 14.2                 | 26.45          | 14.9                         |
| 71/M<br>/C <sup>+</sup> | Atrial valve replacement         | 2        | R                               | 1.5           | 3.5           | 4.5            | 7.37            | 10                   | 28.99          | 10.2                         |
| 66/M<br>/C              | CABG                             | 3        | R                               | 1.2           | 3             | 4.4            | 7.35            | 11.7                 | 26.95          | 11.4                         |
| 70/M<br>/C              | CABG                             | 1        | R                               | 0.8           | M             | 3.7            | 7.31            | 13                   | 30.53          | 13.2                         |
| 58/F/<br>C              | Thoracotomy                      | 4        | R                               | 0.5           | M             | 4              | 7.36            | 9                    | 29.12          | 9.3                          |
| 82/M<br>/C              | Chest trauma                     | 10       | R                               | 0.9           | M             | 2.5            | 7.38            | 11.5                 | 25.3           | 11.7                         |
| Mean $\pm$ SD           |                                  |          |                                 | 1.2 $\pm$ 0.2 | 3.1 $\pm$ 0.4 | 3.74 $\pm$ 0.6 | 7.36 $\pm$ 0.02 | 11.6 $\pm$ 1.9       | 27.5 $\pm$ 1.9 | 11.8 $\pm$ 2                 |

**Legend:** C, Caucasian; H, Hispanic; M, Missing data; R, Recovered. **Note:** “‡” denotes patients with CKD (eGFR less than 60ml/min/1.73 m<sup>2</sup>). All laboratory levels drawn at enrollment except when indicated.
